# Supplementary material for: Saxifraga spinulosa-Derived Components Rapidly Inactivate Multiple Viruses Including SARS-CoV-2
Source: Viruses. 2020 Jun 28;12(7):699. doi: 10.3390/v12070699 (PMC7411974; doi:10.3390/v12070699)
Supplement: Supplementary file 1 [file viruses-12-00699-s001.pdf]

**Table S1** The sequence of primers used in this study and each PCR condition.

| Primers name                   | Primer sequences                                                     | PCR condition                                                                                                                     |
|--------------------------------|----------------------------------------------------------------------|-----------------------------------------------------------------------------------------------------------------------------------|
| IAV-Primer set 1<br>(982 bp)   | Fwd: 5'-ATGAGTCTTCTAACCGAGGTC-3'<br>Rev: 5'-GTCAGCATAGAGCTGGAGTAA-3' | 95°C for 5 min<br>↓<br>[95°C for 30 sec, 52°C for 30 sec, 72°C for 1 min] x 25, 24 times (Figure 2A, 2C)<br>↓<br>72 °C for 10 min |
| IAV-Primer set 2<br>(253 bp)   | Fwd: 5'-AAGACCAATCCTGTCACCTC-3'<br>Rev: 5'-CAGTTGTATGGGCCTCATATAC-3' | 95°C for 5 min<br>↓<br>[95°C for 30 sec, 52°C for 30 sec, 72°C for 1 min] x 22 times<br>↓<br>72 °C for 10 min                     |
| IAV-Primer set 3<br>(320 bp)   | Fwd: 5'-ACAGATTGCTGACTCCCA-3'<br>Rev: 5'-TGATCCTCTCGCTATTGCC-3'      | 95°C for 5 min<br>↓<br>[95°C for 30 sec, 52°C for 30 sec, 72°C for 1 min] x 22 times<br>↓<br>72 °C for 10 min                     |
| FCV-Primer set<br>(264 bp)     | Fwd: 5'-TCCACACTAGCGTCAACTGG-3'<br>Rev: 5'-GACGAGCGTCAAACAGAACA-3'   | 95°C for 5 min<br>↓<br>[95°C for 30 sec, 49°C for 30 sec, 72°C for 1 min] x 32 times<br>↓<br>72 °C for 10 min                     |
| MNV-F1 and -R1<br>[1] (721 bp) | Fwd: 5'-GCCATGCATGGTGAAAAG-3'<br>Rev: 5'-CATGCARACCAGGCGCATAG-3'     | 95°C for 5 min<br>↓<br>[95°C for 30 sec, 49°C for 30 sec, 72°C for 1 min] x 33 times<br>↓                                         |

|                                            |                                                                    |                                                                                                                  |
|--------------------------------------------|--------------------------------------------------------------------|------------------------------------------------------------------------------------------------------------------|
|                                            |                                                                    | 72 °C for 10 min                                                                                                 |
| NIID_2019-nCoV<br>_N_F2 and R2<br>(158 bp) | Fwd: 5'-AAATTTTGGGGACCAGGAAC-3'<br>Rev: 5'-TGGCAGCTGTGTAGGTCAAC-3' | 95°C for 5 min<br>↓<br>[95°C for 30 sec, 49°C for 30 sec, 72°C<br>for 1 min] x 30 times<br>↓<br>72 °C for 10 min |

Figure S1

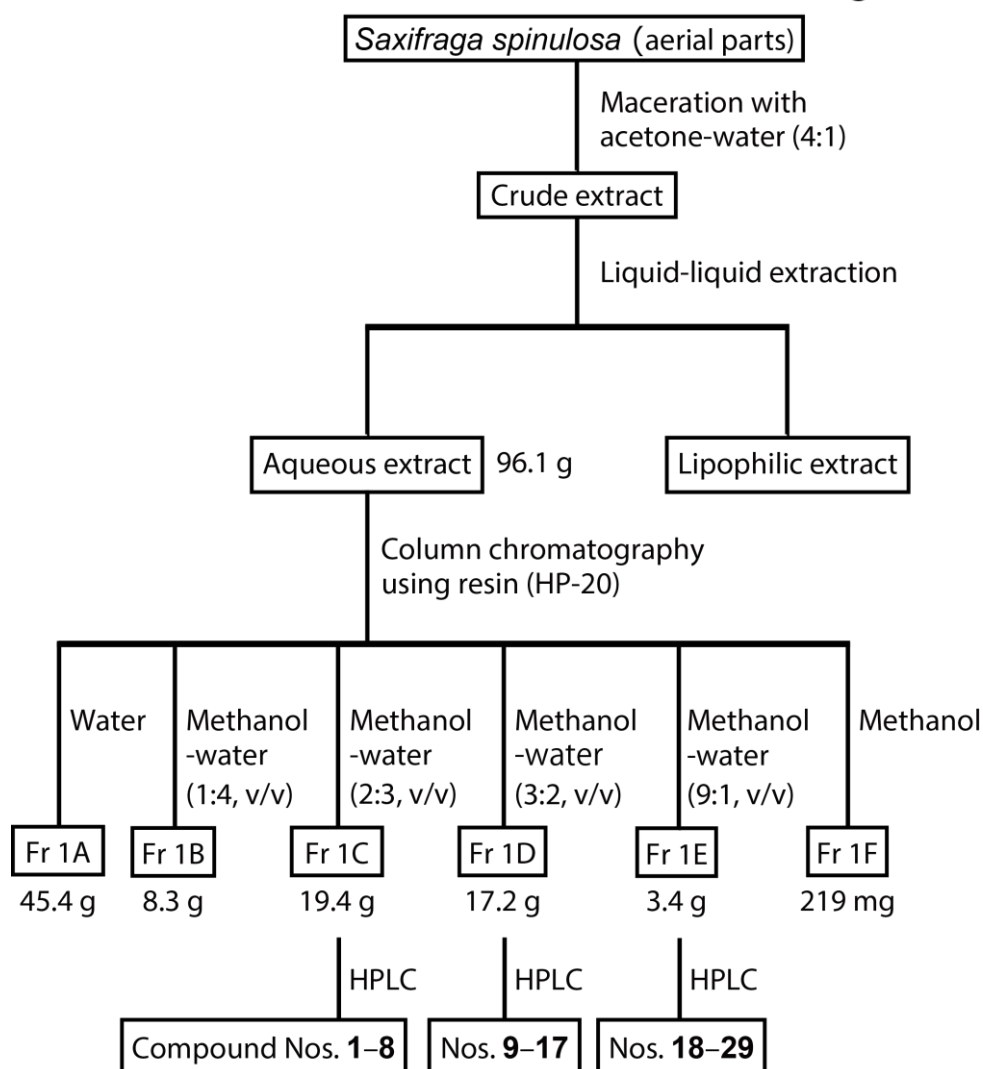

**Figure S1.** Scheme of the sample extraction and isolation.

Figure S2

Target: MNV, Concentration of sample: 25  $\mu\text{g/ml}$

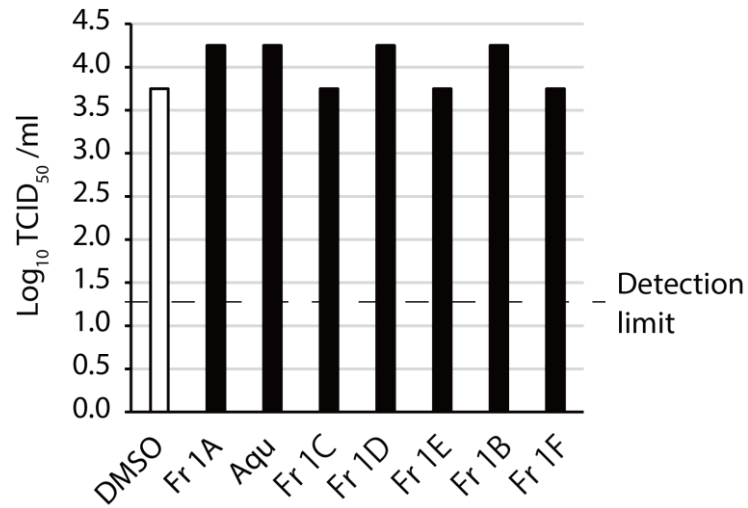

**Figure S2.** Evaluation of the MNV-inactivating activity of 25  $\mu\text{g/ml}$  SS-derived fractions. The SS-derived fractions and DMSO control were added to solutions containing MNV followed by incubation at 25°C for 48 h. Viral titer was then evaluated. Aqu: Aqueous extract.

**Figure S3**

**A**

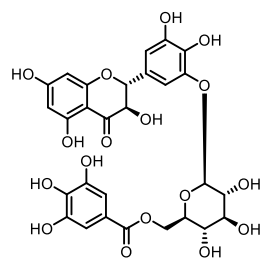

**Compound 1**

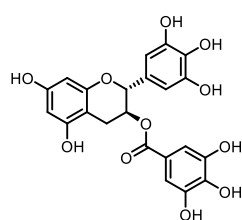

**Compound 2**

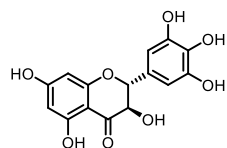

**Compound 3**

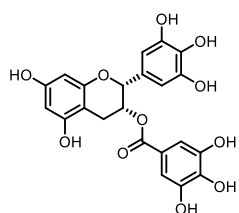

**Compound 4**

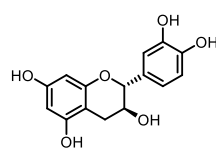

**Compound 5**

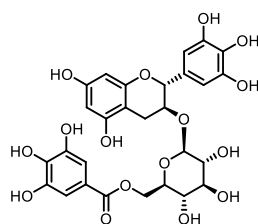

**Compound 6**

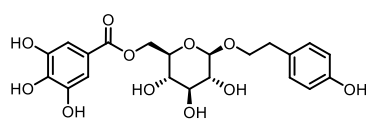

**Compound 7**

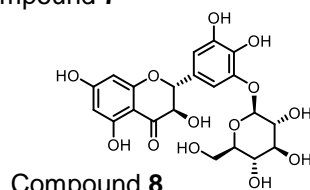

**Compound 8**

**B**

**Figure S3**

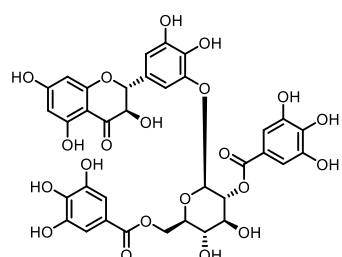

**Compound 9**

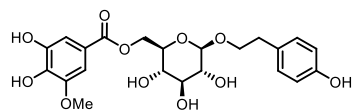

**Compound 10**

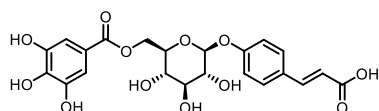

**Compound 11**

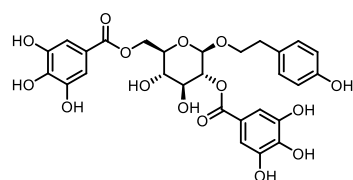

**Compound 12**

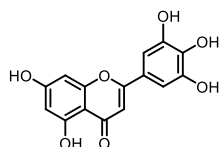

**Compound 13**

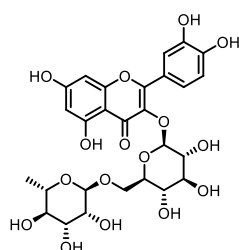

**Compound 14**

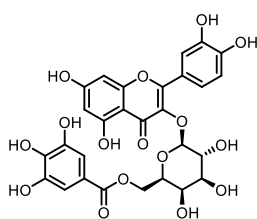

**Compound 15**

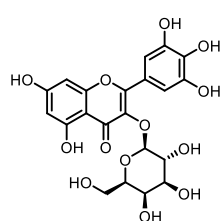

**Compound 16**

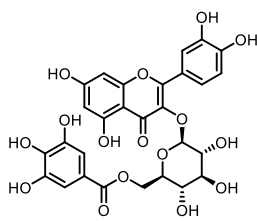

**Compound 17**

**C****Figure S3**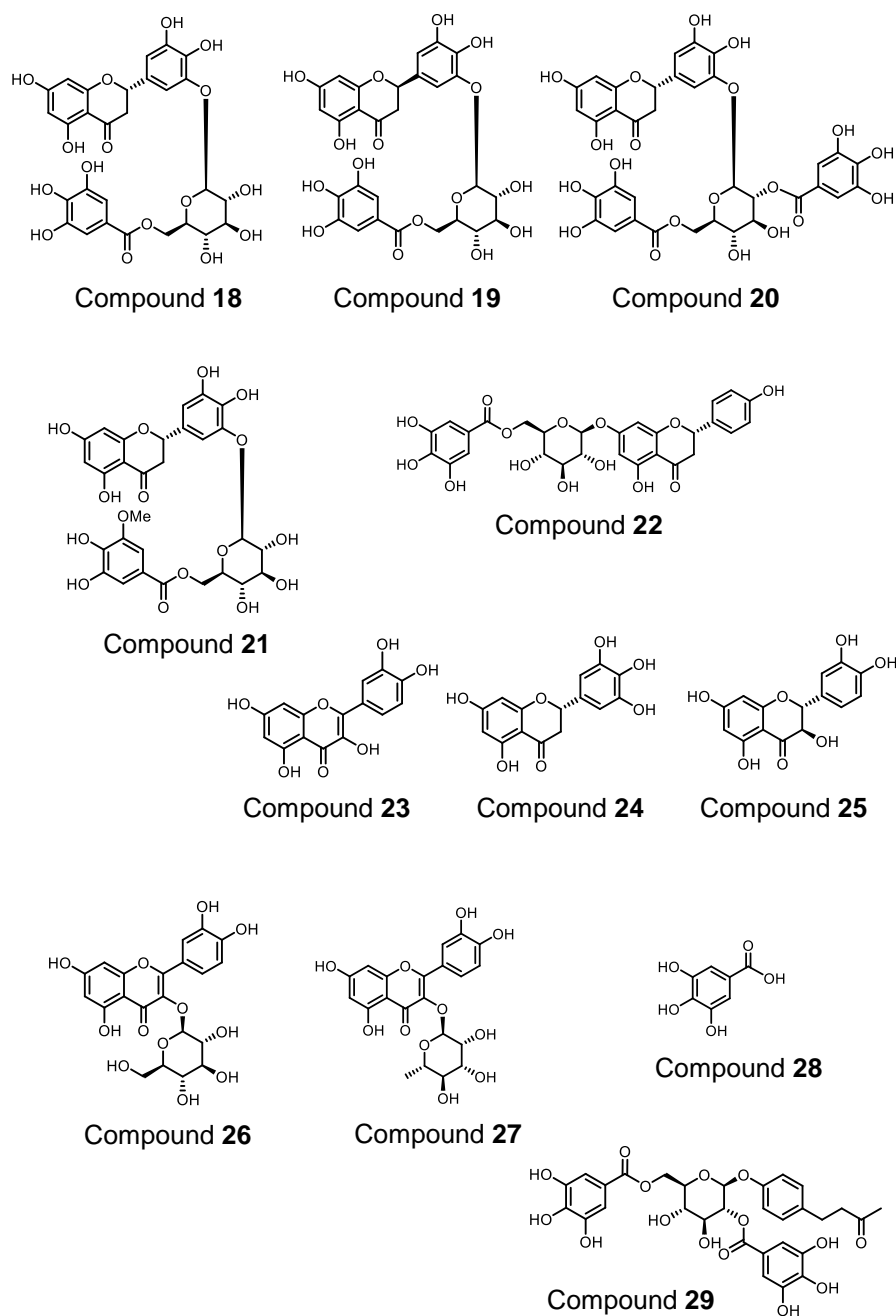

**Figure S3.** Chemical structures of compounds isolated from *SS*.  
(A–C) Compounds isolated from (A) Fr 1C, (B) Fr 1D, and (C) Fr 1E.

Figure S4

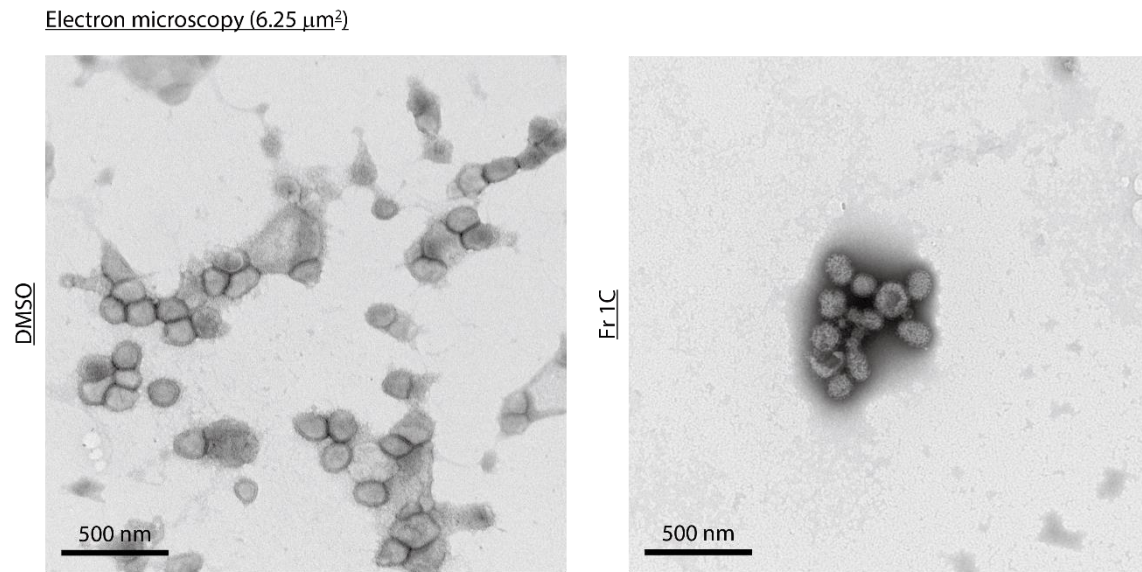

**Figure S4.** Electron microscopic images of IAV under low magnification (see Figure 3). The IAV virions featured in Figure 3 were evaluated using transmission electron microscopy under low magnification. The panels to the left and right include representative images of DMSO- and Fr 1C-treated virion particles, respectively in  $6.25 \mu\text{m}^2$  fields.

Figure S5

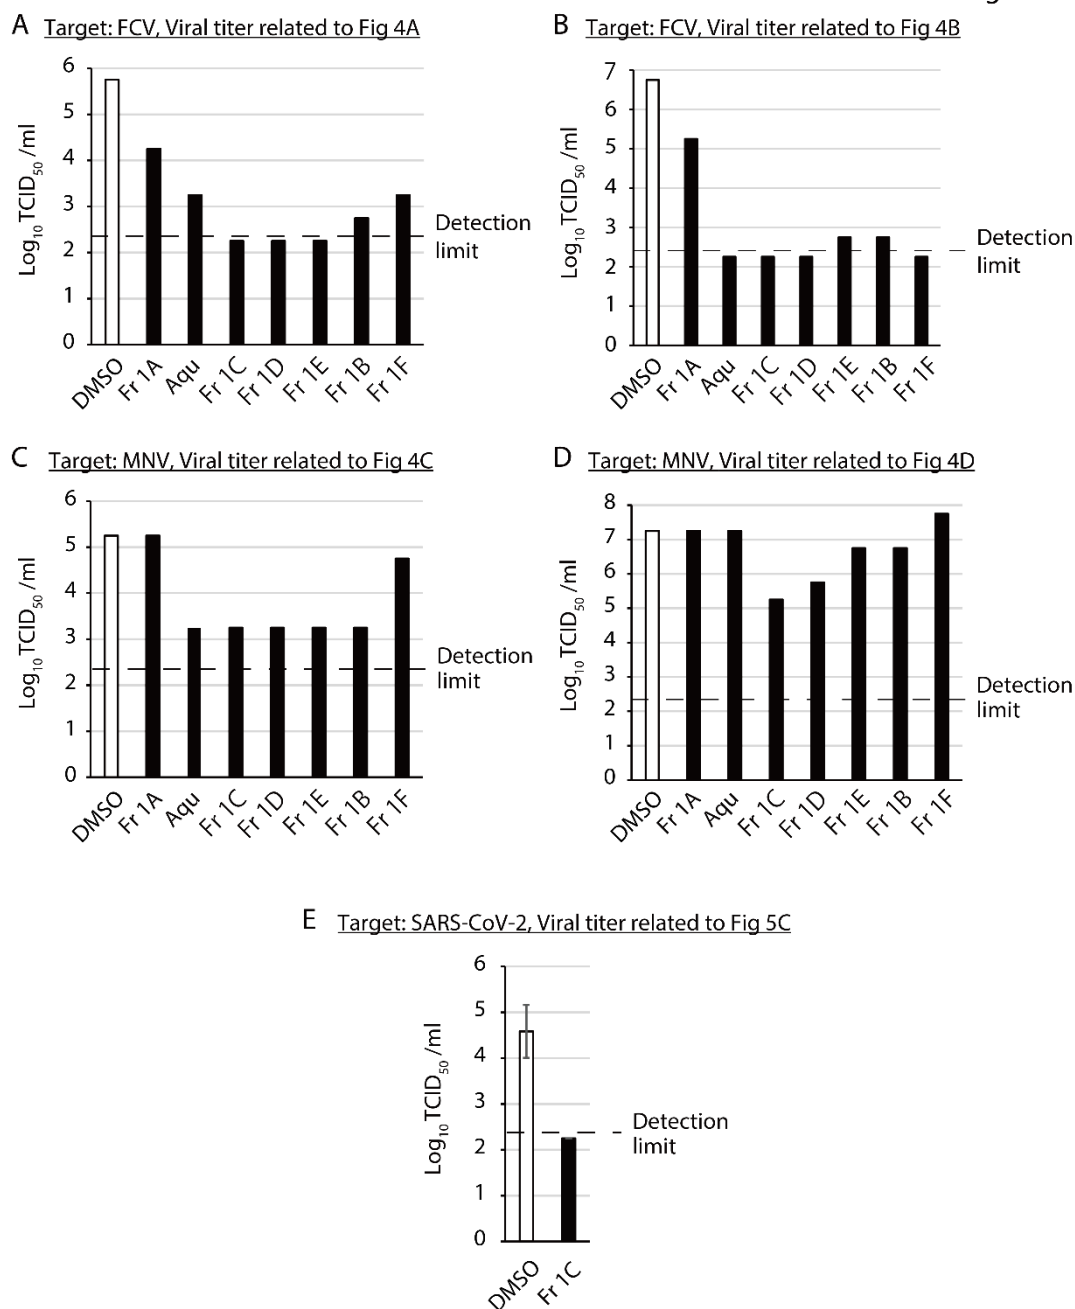

**Figure S5.** The viral titers of FCV, MNV, and SARS-CoV-2 treated with SS-derived fractions (see Figures 4 and 5).

(A–E) Viral titer of the viral mixtures in (A) Figure 4A, (B) Figure 4B, (C) Figure 4C, (D) Figure 4D, and (E) Figure 5C. Aqu: Aqueous extract.

## Reference

1. Kitajima, M.; Oka, T.; Tohya, Y.; Katayama, H.; Takeda, N.; Katayama, K.  
Development of a broadly reactive nested reverse transcription-PCR assay to  
detect murine noroviruses, and investigation of the prevalence of murine  
noroviruses in laboratory mice in Japan. *Microbiol. Immunol.* **2009**, 53, 531-534,  
doi:10.1111/j.1348-0421.2009.00152.x.
